# Supplementary material
Source: publisher figshare collection journal article supplement (https://sage.figshare.com/ndownloader/files/25557362)
Supplement: Supplementary file 1 [file 25557362]

Supplemental online material

Distribution (%) of Demographic Variables.

|                                      | %    | N   |
|--------------------------------------|------|-----|
| <b>Gender</b>                        |      |     |
| Female                               | 55.5 | 306 |
| Male                                 | 44.5 | 245 |
| <b>Mother's Socioeconomic Status</b> |      |     |
| Entrepreneur (self-employed)         | 1.4  | 7   |
| Higher white-collar employee         | 26.5 | 131 |
| Lower white-collar employee          | 52.5 | 260 |
| Blue-collar worker                   | 13.7 | 68  |
| Not in employment                    | 5.1  | 25  |
| Other                                | .8   | 4   |
| <b>Father's Socioeconomic Status</b> |      |     |
| Entrepreneur (self-employed)         | 6.3  | 30  |
| Higher white-collar employee         | 33.8 | 160 |

|                                                                    |      |     |
|--------------------------------------------------------------------|------|-----|
| Lower white-collar employee                                        | 19.8 | 94  |
| Blue-collar worker                                                 | 34.6 | 164 |
| Not in employment                                                  | 5.3  | 25  |
| Other                                                              | .2   | 1   |
| <b>Highest Educational Degree at Age 28</b>                        |      |     |
| Upper secondary education: High school or vocational school degree | 43.8 | 239 |
| Polytechnic degree                                                 | 25.4 | 139 |
| University degree                                                  | 25.8 | 141 |
| Other                                                              | 4.9  | 27  |
| <b>Education and Work Situation at Age 28</b>                      |      |     |
| Studying at a university / polytechnic institute / other           | 29.4 | 162 |
| Working                                                            | 67.3 | 371 |
| Unemployed                                                         | 10.2 | 56  |
